# Supplementary material for: Effects of Microplate Type and Broth Additives on Microdilution MIC Susceptibility Assays
Source: PubMed Central journal article supplement (PMC6325200; doi:10.1128/aac.01760-18), 2018-12-21
Supplement: 50af9bb6786b4530120bc558db62b77c_AAC.01760-18-s0001.pdf [file 50af9bb6786b4530120bc558db62b77c_AAC.01760-18-s0001.pdf]

1 **Supplemental Information**

2

3 **Effects of Microplate Type and Broth Additives on Microdilution MIC Susceptibility**

4 **Assays**

5

6

7 Angela Kavanagh,\* Soumya Ramu,\* Yujing Gong, Matthew A Cooper# and Mark A. T.

8 Blaskovich#

9

10 Institute for Molecular Bioscience, The University of Queensland, St Lucia, Queensland,  
11 Australia.

12

13 Running Head: Plate and Additive Effects on Broth MIC Determinations

14

15 # Address correspondence to Mark A.T. Blaskovich, m.blaskovich@uq.edu.au, and

16 Matthew A. Cooper, m.cooper@uq.edu.au

17 \* A.K., and S.R. contributed equally to this work.

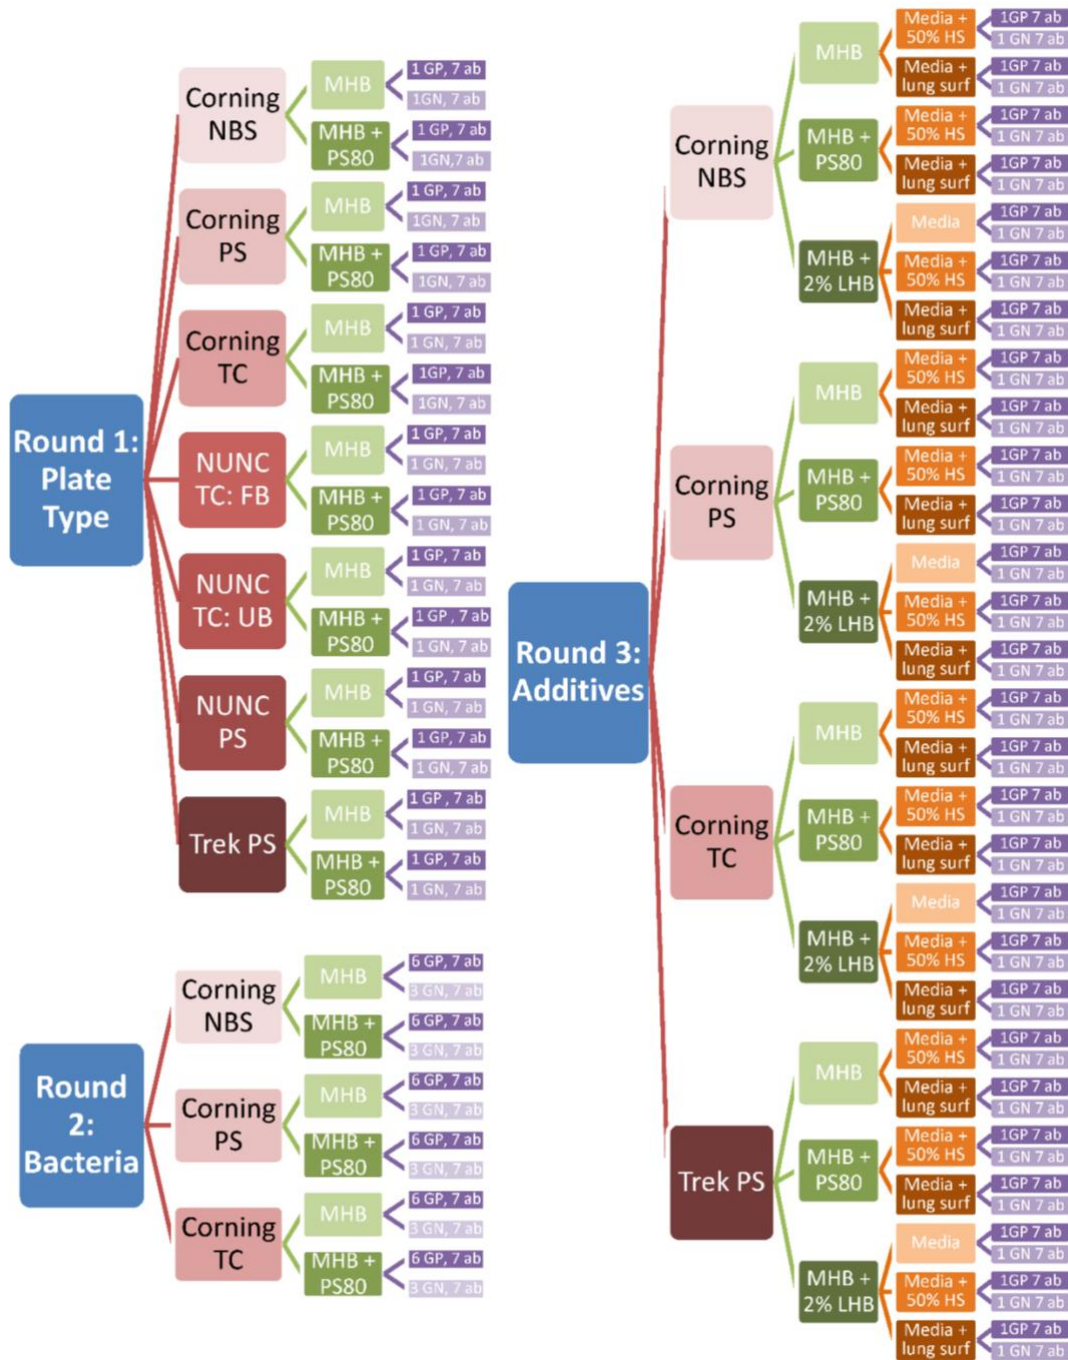

18  
19

20 **Figure S1.** Experimental Design

21 (Ab = antibiotic, GP = Gram-positive bacteria, GN = Gram-negative bacteria,

22 HS = human serum, LHB = lysed horse blood, MHB = Mueller-Hinton Broth, PS =

23 polysorbate 80)

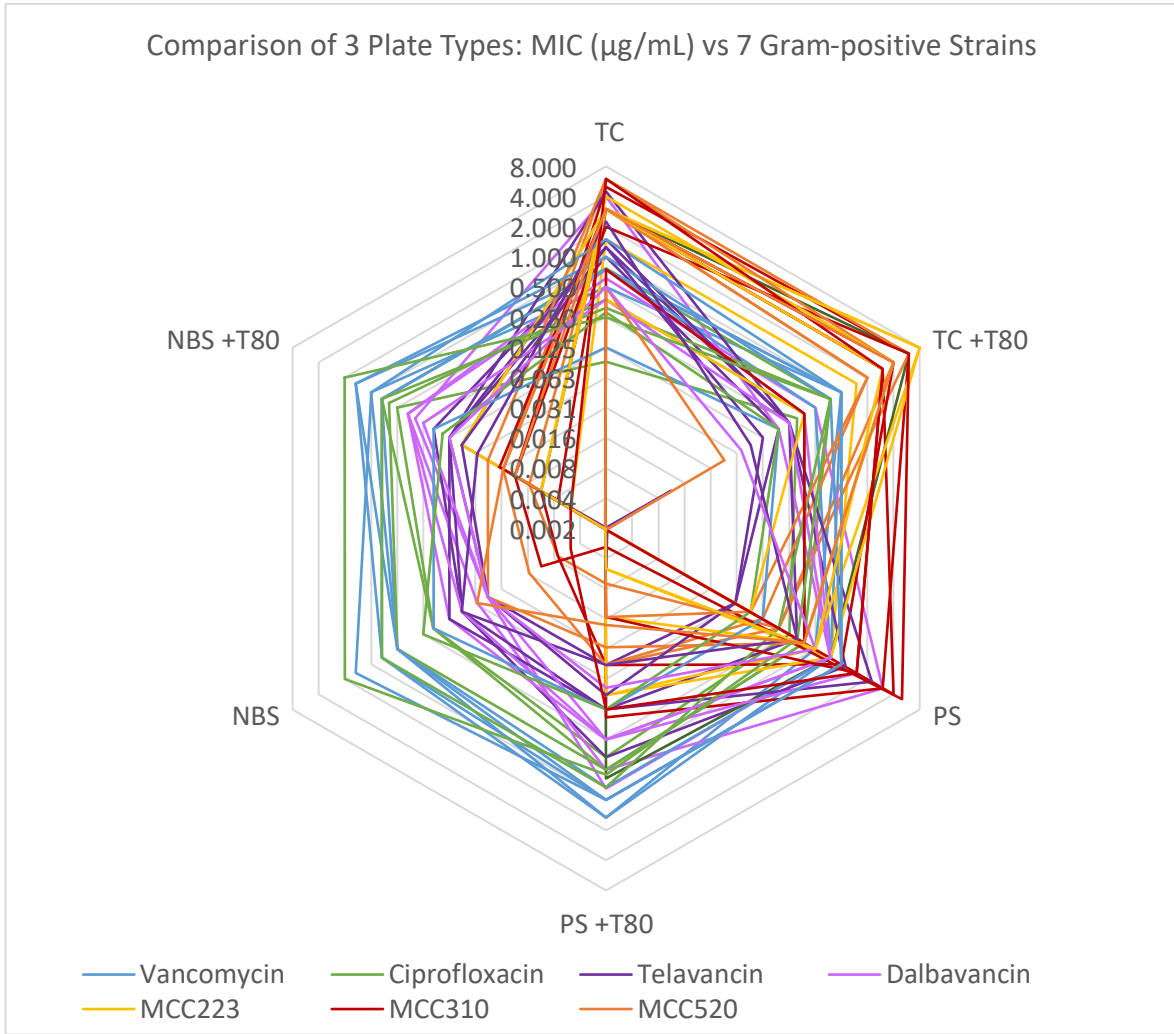

25  
26

27 **Figure S2.** Comparison of antibiotic MICs determined in three plate types with and  
28 without the addition of 0.002% Tween-80, against 7 strains of Gram-positive bacteria  
29 (MRSA, MSSA, GISA, *S. pneumoniae*, MDR *S. pneumoniae*, *S. pyogenes*, *E. faecalis*).  
30 Note: each hexagon represents one antibiotic-strain pair, with the same colour used for  
31 one antibiotic against all 7 strains. If the MIC remains constant across plate  
32 types/conditions, the plot should be symmetrical, as for vancomycin (blue).

33

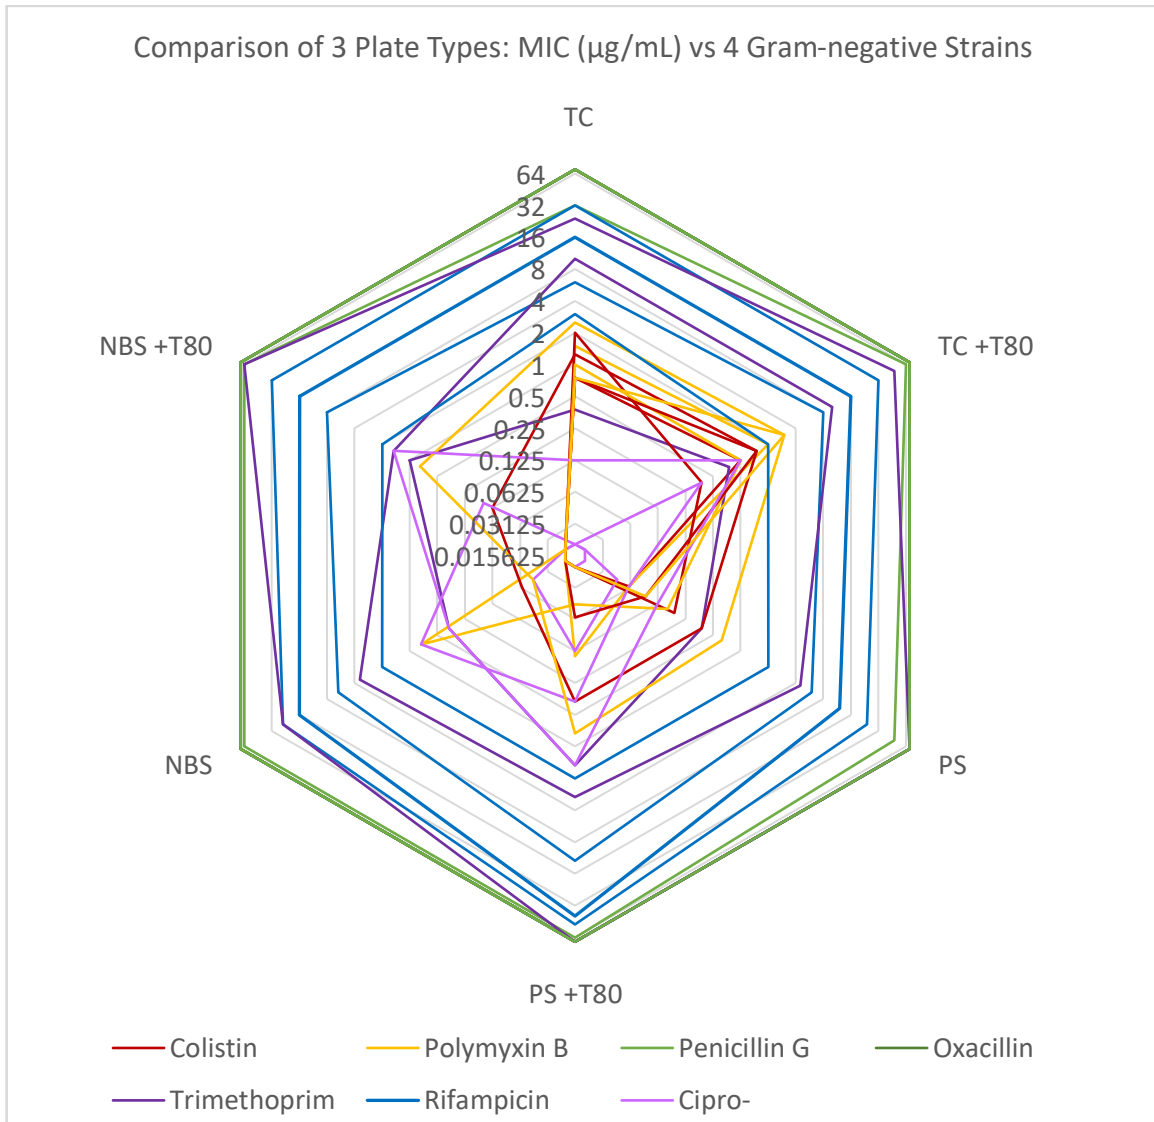

35

36

37

**Figure S3.** Comparison of antibiotic MICs determined in three plate types with and without the addition of 0.002% Tween-80, against 4 strains of Gram-negative bacteria (*E. coli*, *K. pneumoniae*, *A. baumannii*, *P. aeruginosa*). Note: each hexagon represents one antibiotic-strain pair, with the same colour used for one antibiotic against all 7 strains. If the MIC remains constant across plate types/conditions, the plot should be symmetrical, as for rifampicin (blue).

43

44

45 **Table S1.** Comparison of 3 Plate Types vs Seven Gram Positive Bacteria in Mueller  
 46 Hinton Broth in the presence and absence of Tween-80 (polysorbate 80) (MIC, µg/mL)

| Bacteria                           | Plate   | Media | Antibiotic      |                    |                 |                  |             |             |            |
|------------------------------------|---------|-------|-----------------|--------------------|-----------------|------------------|-------------|-------------|------------|
|                                    |         |       | Vanco-<br>mycin | Cipro-<br>floxacin | Tela-<br>vancin | Dalba-<br>vancin | MCC223      | MCC310      | MCC520     |
| MRSA                               | Corning | -T80  | 0.5             | 0.125-0.25         | 0.03-0.06       | 0.03-0.06        | ≤0.003      | ≤0.003      | 0.007      |
|                                    | NBS     | +T80  | 1               | 0.5                | 0.125           | 0.125-0.5        | 0.003-0.007 | 0.007       | 0.015      |
| <i>S. aureus</i><br>ATCC<br>43300  | Corning | -T80  | 0.5             | 0.06-0.125         | 1               | 4                | 1-2         | 2-4         | 2-4        |
|                                    | TC      | +T80  | 1               | 0.125-0.5          | 0.125-0.25      | 0.125-0.25       | 1-2         | 2-4         | 4          |
|                                    | Corning | -T80  | 0.5             | 0.25               | 0.06            | 0.5-1            | 0.5-1       | 4           | 0.125-0.25 |
|                                    | PS      | +T80  | 1-2             | 0.25-0.5           | 0.03-0.06       | 0.03-0.125       | 0.003-0.007 | ≤0.003      | 0.007      |
| MSSA                               | Corning | -T80  | 0.5-1           | 0.125-0.25         | 0.06-0.125      | 0.06             | ≤0.003      | ≤0.003      | ≤0.003     |
|                                    | NBS     | +T80  | 1-2             | 0.5-1              | 0.125-0.25      | 0.25-0.5         | 0.06-0.125  | 0.015-0.03  | 0.03       |
| <i>S. aureus</i><br>ATCC<br>25923  | Corning | -T80  | 0.5-1           | 0.03-0.125         | 0.5-2           | 0.25-1           | 2-4         | 2-8         | 4-8        |
|                                    | TC      | +T80  | 1               | 0.5-1              | 0.25            | 0.5              | 4-8         | 4-8         | 4-8        |
|                                    | Corning | -T80  | 0.5-1           | 0.25-0.5           | 0.25-2          | 2-4              | 0.5-1       | 2-4         | 0.125-0.25 |
|                                    | PS      | +T80  | 1-2             | 0.5                | 0.25-0.5        | 0.5              | 0.25-1      | 0.06-0.25   | 0.03-0.06  |
| <i>S. pneum-<br/>oniae</i>         | Corning | -T80  | 0.5-1           | 0.5                | 0.125           | 0.06-0.125       | ≤0.003      | 0.007-0.015 | 0.03-0.06  |
|                                    | NBS     | +T80  | 0.5-1           | 0.25-1             | 0.125           | 0.25-0.5         | 0.06-0.125  | 0.015-0.03  | 0.03-0.06  |
| ATCC<br>33440                      | Corning | -T80  | 0.5-1           | 0.25-0.5           | 1-2             | 0.5-1            | 2-4         | 2           | 4-8        |
|                                    | TC      | +T80  | 1               | 0.25-0.5           | 0.25            | 0.25-0.5         | 8           | 4-8         | 4          |
|                                    | Corning | -T80  | 1               | 0.25-0.5           | 0.5-4           | 1-2              | 0.5-1       | 2-8         | 0.125-0.25 |
|                                    | PS      | +T80  | 1               | 0.5                | 0.125           | 0.25             | 0.06-0.125  | 0.003-0.06  | 0.03       |
| <i>S.<br/>pyogenes</i>             | Corning | -T80  | 0.125-0.25      | 0.25               | ≤0.003          | ≤0.003           | ≤0.003      | ≤0.003      | ≤0.003     |
|                                    | NBS     | +T80  | 0.125-0.25      | 0.06-0.25          | 0.003-0.015     | ≤0.003           | ≤0.003      | ≤0.003      | ≤0.003     |
| ATCC<br>12344                      | Corning | -T80  | 0.125           | 0.06-0.5           | ≤0.003          | ≤0.003           | 0.25-0.5    | 0.5-1       | 0.5        |
|                                    | TC      | +T80  | 0.125-0.25      | 0.125-0.25         | 0.007-0.015     | ≤0.003           | 0.25-0.5    | 0.25-0.5    | 0.03-0.06  |
|                                    | Corning | -T80  | 0.125           | 0.06-0.125         | ≤0.003          | ≤0.003           | 0.06-0.125  | 0.25-0.5    | ≤0.003     |
|                                    | PS      | +T80  | 0.125           | 0.125              | 0.003-0.007     | ≤0.003           | ≤0.003      | ≤0.003      | ≤0.003     |
| <i>S. pneum-<br/>oniae</i>         | Corning | -T80  | 0.5             | 0.5-1              | 0.03-0.06       | 0.03-0.06        | ≤0.003      | ≤0.003      | ≤0.003     |
|                                    | NBS     | +T80  | 1-2             | 0.5-1              | 0.06-0.125      | 0.25             | 0.007-0.015 | 0.007-0.06  | 0.015-0.03 |
| ATCC<br>700677                     | Corning | -T80  | 1               | 0.125-0.5          | 0.5-2           | 0.25-0.5         | 4           | 2-4         | 2-4        |
|                                    | TC      | +T80  | 0.5-1           | 0.5-1              | 0.125           | 0.25             | 4           | 2-4         | 2          |
|                                    | Corning | -T80  | 1               | 0.125-0.25         | 0.06            | 0.5-1            | 0.25-0.5    | 1-2         | 0.06-0.125 |
|                                    | PS      | +T80  | 1               | 0.5-1              | 0.06-0.125      | 0.25             | 0.015       | 0.015       | 0.015      |
| <i>E. faecalis</i>                 | Corning | -T80  | 1-2             | 2                  | 0.06-0.125      | 0.03-0.06        | ≤0.003      | 0.003-0.007 | 0.06       |
|                                    | NBS     | +T80  | 1               | 2                  | 0.06            | 0.125            | 0.007-0.015 | 0.003-0.007 | 0.03       |
| ATCC<br>29212                      | Corning | -T80  | 1-2             | 0.25               | 0.5-4           | 0.5              | 2-4         | 4-8         | 2-4        |
|                                    | TC      | +T80  | 1               | 0.5-1              | 0.06-0.125      | 0.015-0.125      | 2-4         | 2-4         | 4          |
|                                    | Corning | -T80  | 1               | 0.125-0.5          | 0.125-0.5       | 0.5              | 0.5         | 1-2         | 0.25-0.5   |
|                                    | PS      | +T80  | 1               | 0.125-1            | 0.03-0.06       | 0.03-0.125       | 0.003-0.007 | 0.125       | 0.007-0.03 |
| <i>S. aureus</i><br>GISA<br>NRS 2; | Corning | -T80  | 0.5             | 64                 | 0.06-0.125      | 0.125            | ≤0.003      | 0.007       | 0.015      |
|                                    | NBS     | +T80  | 0.5-1           | 64                 | 0.125           | 0.25-0.5         | 0.06-0.125  | 0.007-0.015 | 0.03       |
| ATCC<br>700698                     | Corning | -T80  | 0.5-1           | 32-64              | 1-8             | 0.5-1            | 2-4         | 2-4         | 2-4        |
|                                    | TC      | +T80  | 0.5             | 64                 | 0.25            | 0.25-0.5         | 8           | 4           | 2          |
|                                    | Corning | -T80  | 0.5-1           | 32->64             | 0.125-0.5       | 0.5-1            | 0.5         | 1           | 0.125      |
|                                    | PS      | +T80  | 0.5-1           | 64                 | 0.125           | 0.25             | 0.06-0.125  | 0.03-0.06   | 0.03-0.06  |

47

48

50 **Table S2.** Comparison of 3 Plate Types vs Four Gram Negative Bacteria in Mueller  
 51 Hinton Broth in the presence and absence of Tween-80 (polysorbate 80) (MIC,  $\mu\text{g/mL}$ )

| Bacteria                              | Plate   | Media | Antibiotic  |               |           |              |             |              |            |
|---------------------------------------|---------|-------|-------------|---------------|-----------|--------------|-------------|--------------|------------|
|                                       |         |       | Colistin    | Ciprofloxacin | Oxacillin | Trimethoprim | Polymyxin B | Penicillin G | Rifampicin |
| <i>E. coli</i><br>ATCC<br>25922       | Corning | -T80  | $\leq 0.03$ | $\leq 0.03$   | >64       | 0.25-0.5     | $\leq 0.03$ | 64           | 4-8        |
|                                       | NBS     | +T80  | $\leq 0.03$ | $\leq 0.03$   | >64       | 1            | $\leq 0.03$ | 64           | 8          |
|                                       | Corning | -T80  | 0.5-1       | $\leq 0.03$   | >64       | 0.25-0.5     | 1-2         | 32           | 4-8        |
|                                       | TC      | +T80  | 1           | $\leq 0.03$   | >64       | 0.5-1        | 2           | 64           | 8          |
|                                       | Corning | -T80  | 0.06        | $\leq 0.03$   | >64       | 0.25-0.5     | 0.06        | 32-64        | 4-8        |
|                                       | PS      | +T80  | $\leq 0.03$ | $\leq 0.03$   | >64       | 1-2          | 0.03-0.25   | 64           | 8-16       |
| <i>K. pneumoniae</i><br>ATCC<br>13883 | Corning | -T80  | $\leq 0.03$ | 0.03-0.06     | >64       | 4-8          | 0.03-0.125  | >64          | 16         |
|                                       | NBS     | +T80  | $\leq 0.03$ | $\leq 0.03$   | >64       | 1-2          | $\leq 0.03$ | >64          | 16         |
|                                       | Corning | -T80  | 2           | $\leq 0.03$   | >64       | 4-16         | 1           | >64          | 16         |
|                                       | TC      | +T80  | 0.25-0.5    | $\leq 0.03$   | >64       | 4-16         | 1           | >64          | 16         |
|                                       | Corning | -T80  | 0.125-0.25  | 0.03-0.06     | >64       | 1-8          | 0.06-0.25   | >64          | 8-16       |
|                                       | PS      | +T80  | $\leq 0.03$ | 0.125         | >64       | 2-4          | 0.03-0.06   | >64          | 16-64      |
| <i>P. aeruginosa</i><br>ATCC<br>10145 | Corning | -T80  | 0.06        | 0.03-0.125    | >64       | >64          | 0.03-0.06   | >64          | 16-32      |
|                                       | NBS     | +T80  | 0.125       | 0.06-0.25     | >64       | >64          | 0.03-0.125  | >64          | 32         |
|                                       | Corning | -T80  | 0.5-2       | $\leq 0.03$   | >64       | >64          | 1-4         | >64          | 32         |
|                                       | TC      | +T80  | 1-2         | 0.25-0.5      | >64       | >64          | 2-4         | >64          | 32         |
|                                       | Corning | -T80  | 0.25-0.5    | 0.06          | >64       | >64          | 0.25-1      | >64          | 16-32      |
|                                       | PS      | +T80  | 0.25-0.5    | 0.25-0.5      | >64       | >64          | 0.5-1       | >64          | 32-64      |
| <i>A. baumannii</i><br>ATCC<br>19606  | Corning | -T80  | $\leq 0.03$ | 0.25-0.5      | >64       | 16-32        | $\leq 0.03$ | >64          | 2          |
|                                       | NBS     | +T80  | $\leq 0.03$ | 1-2           | >64       | 64           | $\leq 0.03$ | >64          | 2          |
|                                       | Corning | -T80  | 0.5-1       | 0.125         | >64       | 16-32        | 0.5-1       | >64          | 2-4        |
|                                       | TC      | +T80  | 1-2         | 1             | >64       | 32-64        | 2-4         | >64          | 2          |
|                                       | Corning | -T80  | 0.06-0.125  | 0.125         | >64       | >64          | 0.06-0.125  | >64          | 2          |
|                                       | PS      | +T80  | 0.06        | 1-2           | >64       | >64          | $\leq 0.03$ | >64          | 2          |
